# Supplementary material for: Insights into the scalability of catalytic upgrading of biomass pyrolysis vapors using micro and bench-scale reactors
Source: Royal Society of Chemistry journal article supplement (doi:10.1039/d0se00303d), 2020-01-01
Supplement: d0se00303d1.pdf [file d0se00303d1.pdf]

# Insights into the scalability of catalytic upgrading of biomass pyrolysis vapors using micro and bench-scale reactors

## *Supporting Information*

Andreas Eschenbacher<sup>a</sup>, Alireza Saraeian<sup>b</sup>, Brent H. Shanks<sup>b</sup>, Peter Arendt Jensen<sup>a</sup>, Ulrik Birk Henriksen<sup>a</sup>,

Jesper Ahrenfeldt<sup>a</sup>, Anker Degn Jensen<sup>a,\*</sup>

\*corresponding author: [aj@kt.dtu.dk](mailto:aj@kt.dtu.dk)

---

<sup>a</sup>Department of Chemical and Biochemical Engineering, Technical University of Denmark (DTU), 2800 Kgs. Lyngby, Denmark

<sup>b</sup>Department of Chemical and Biological Engineering, Iowa State University, Ames, IA 50011, United States

---

The supporting information consists of 13 pages, 4 tables, and 18 figures.

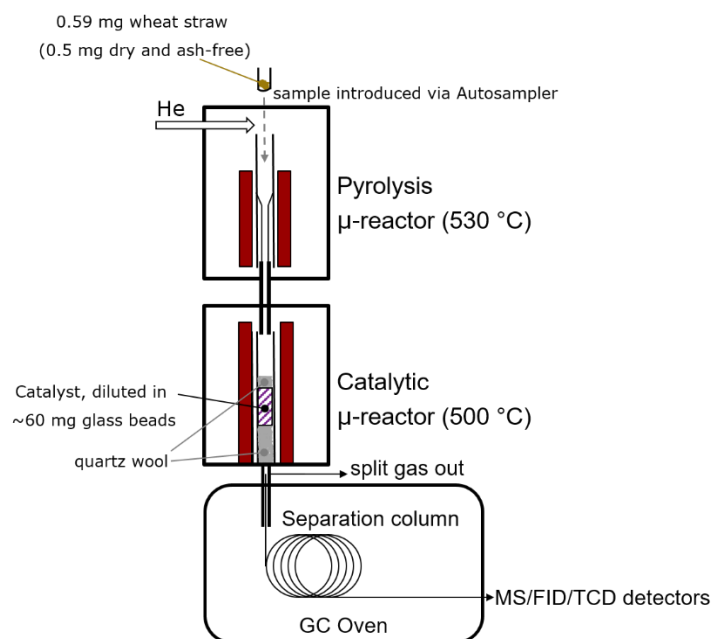

**Fig. S1.** Schematic of tandem microreactor-GC-MS/FID/TCD set-up. Cups with biomass were introduced via auto-sampler. Flowrate was 60 ml/min He. Further experimental details can be found in the experimental section.

**Table S1.** Yields in wt-% of daf wheat straw and standard deviations from three biomass injections using an empty catalytic reactor and a catalytic reactor filled with 2 mg SiC.

|                                           | yield<br>(wt-% of daf biomass) | Standard<br>deviation |
|-------------------------------------------|--------------------------------|-----------------------|
| CO                                        | 7.1                            | 0.13                  |
| CO <sub>2</sub>                           | 17.1                           | 0.22                  |
| C <sub>1</sub> -C <sub>3</sub>            | 0.1                            | 0.02                  |
| C <sub>2</sub> -C <sub>3</sub><br>olefins | 0.3                            | 0.01                  |
| C <sub>4</sub> +                          | 0.3                            | 0.01                  |
| ALI                                       | 0.06                           | 0.005                 |
| MAR                                       | 0.04                           | 0.002                 |
| DAR                                       | 0                              | n.d.                  |
| PH                                        | 0.13                           | 0.010                 |
| ALD                                       | 1.76                           | 0.060                 |
| AC                                        | 2.44                           | 0.091                 |
| KET                                       | 3.91                           | 0.221                 |
| MPH                                       | 0.88                           | 0.076                 |
| FUR                                       | 1.05                           | 0.044                 |
| AL                                        | 0.75                           | 0.057                 |
| EST                                       | 0.75                           | 0.050                 |
| SUG                                       | 0                              | n.d.                  |
| N                                         | 0                              | n.d.                  |

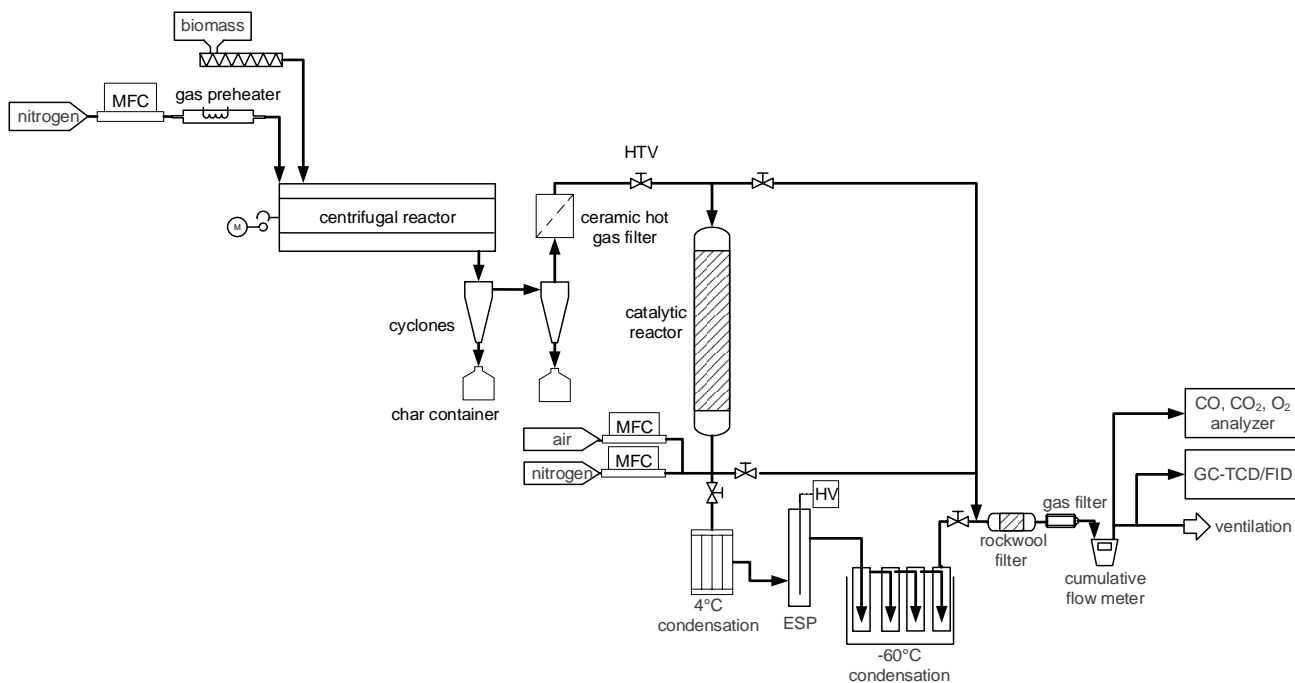

**Fig. S2.** Pyrolysis unit with fixed bed catalytic reactor for vapor upgrading, bio-oil condensation, and gas analysis.

**Table S2.** Overview of surface area, acidity, micro and mesopore volume

| catalyst                                        | $V_{\text{micro}}^a$<br>[cc/g] | $V_{\text{meso}}^b$<br>[cc/g] | BET<br>area <sup>b</sup><br>[m <sup>2</sup> /g] | acidity<br>[mmol<br>NH <sub>3</sub> /g] | basicity<br>[mmol<br>CO <sub>2</sub> /g] | promoter<br>loading<br>[wt.%] |
|-------------------------------------------------|--------------------------------|-------------------------------|-------------------------------------------------|-----------------------------------------|------------------------------------------|-------------------------------|
| Z30                                             | 0.21                           | 0.11                          | 416                                             | 0.51 <sup>c</sup>                       | n.d.                                     | -                             |
| Z55                                             | 0.22                           | 0.12                          | 424                                             | 0.30 <sup>c</sup>                       | n.d.                                     | -                             |
| Z80                                             | 0.20                           | 0.08                          | 419                                             | 0.24 <sup>c</sup>                       | n.d.                                     | -                             |
| mZ30                                            | 0.15                           | 0.41                          | 620                                             | 0.44 <sup>c</sup>                       | n.d.                                     | -                             |
| mZ55                                            | 0.19                           | 0.37                          | 426                                             | 0.25 <sup>c</sup>                       | n.d.                                     | -                             |
| mZ80                                            | 0.20                           | 0.23                          | 454                                             | 0.24 <sup>c</sup>                       | n.d.                                     | -                             |
| $\gamma$ -Al <sub>2</sub> O <sub>3</sub>        | 0                              | 0.53                          | 201                                             | 0.31 <sup>c</sup>                       | 0.004                                    | -                             |
| mZ80/ $\gamma$ - Al <sub>2</sub> O <sub>3</sub> | 0.07                           | 0.38                          | 251                                             | 0.33 <sup>c</sup>                       | n.d.                                     | -                             |
| Na/Al <sub>2</sub> O <sub>3</sub>               | 0                              | 0.34                          | 125                                             | 0.06                                    | 0.018                                    | 9.6                           |
| Pt/TiO <sub>2</sub> <sup>d</sup>                | 0                              | 0.43                          | 51                                              | 0.25                                    | n.d.                                     | 0.6                           |
| Mo/Al <sub>2</sub> O <sub>3</sub> <sup>d</sup>  | 0                              | n.d.                          | n.d.                                            | 0.50                                    | n.d.                                     | n.d. <sup>e</sup>             |
| MoO <sub>3</sub> /TiO <sub>2</sub> <sup>d</sup> | 0                              | 0.23                          | 54                                              | 0.19                                    | n.d.                                     | 5.8                           |

<sup>a</sup>from Ar physisorption; <sup>b</sup>from N<sub>2</sub> physisorption; <sup>c</sup>catalyst was steam treated; <sup>d</sup>acidity was determined for reduced catalyst, <sup>e</sup>not determined due to proprietary reasons; <sup>f</sup>loading of molybdenum

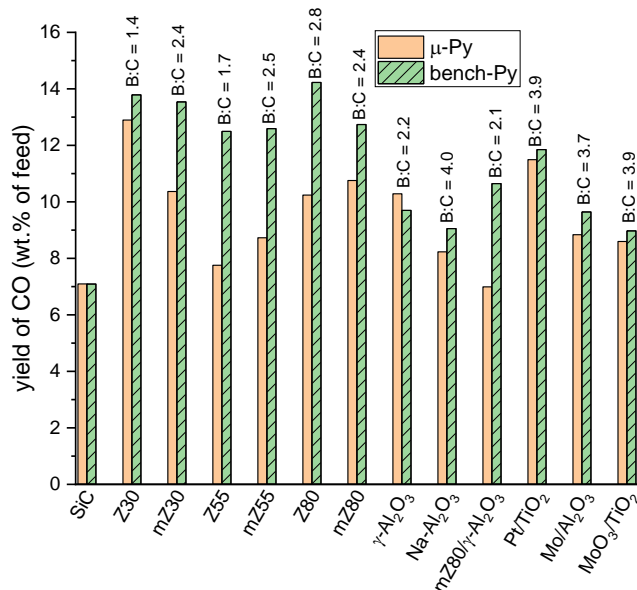

**Fig. S3.** Product yields of CO (wt.% of feed) for vapor upgrading in  $\mu$ -Py (2 mg catalyst) and bench-Py (100–150 g). Z30, Z55, and Z80 refer to HZSM-5 with Si/Al = 16, 28, and 39. mZ30, mZ55, and mZ80 refer to desilicated HZSM-5 with added mesoporosity.

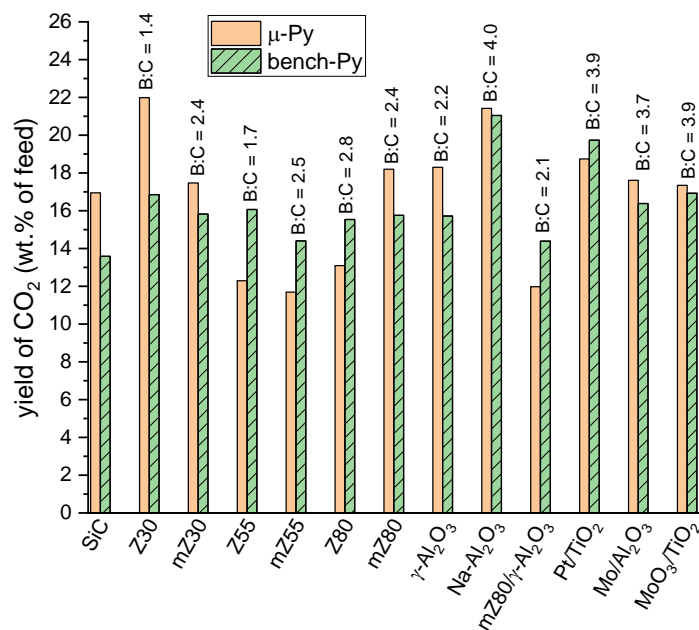

**Fig. S4.** Product yields of CO<sub>2</sub> (wt.% of feed) for vapor upgrading in  $\mu$ -Py (2 mg catalyst) and bench-Py (100–150 g). Z30, Z55, and Z80 refer to HZSM-5 with Si/Al = 16, 28, and 39. mZ30, mZ55, and mZ80 refer to desilicated HZSM-5 with added mesoporosity.

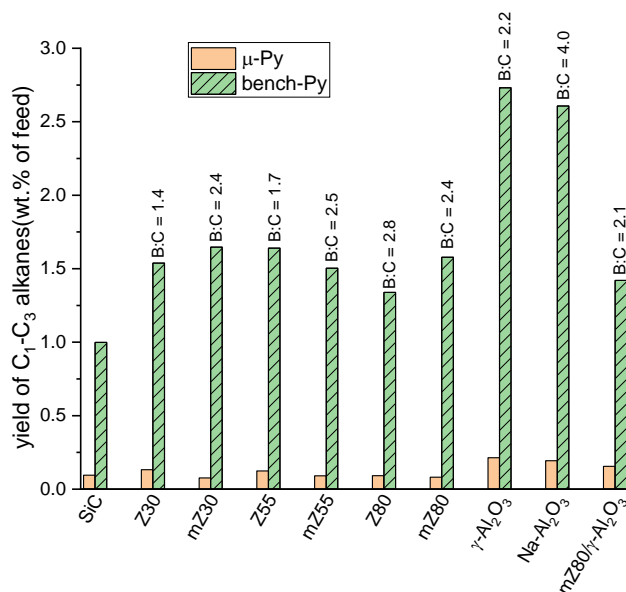

**Fig. S5.** Product yields of C<sub>1</sub>-C<sub>3</sub> alkanes (wt.% of feed) for vapor upgrading in μ-Py (2 mg catalyst) and bench-Py (100–150 g). Z30, Z55, and Z80 refer to HZSM-5 with Si/Al =16, 28, and 39. mZ30, mZ55, and mZ80 refer to desilicated HZSM-5 with added mesoporosity.

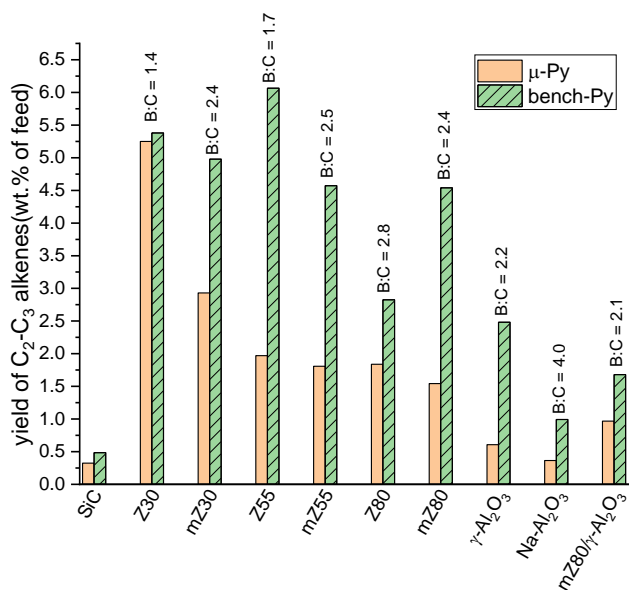

**Fig. S6.** Product yields of C<sub>2</sub>-C<sub>3</sub> alkenes (wt.% of feed) for vapor upgrading in μ-Py (2 mg catalyst) and bench-Py (100–150 g). Z30, Z55, and Z80 refer to HZSM-5 with Si/Al =16, 28, and 39. mZ30, mZ55, and mZ80 refer to desilicated HZSM-5 with added mesoporosity.

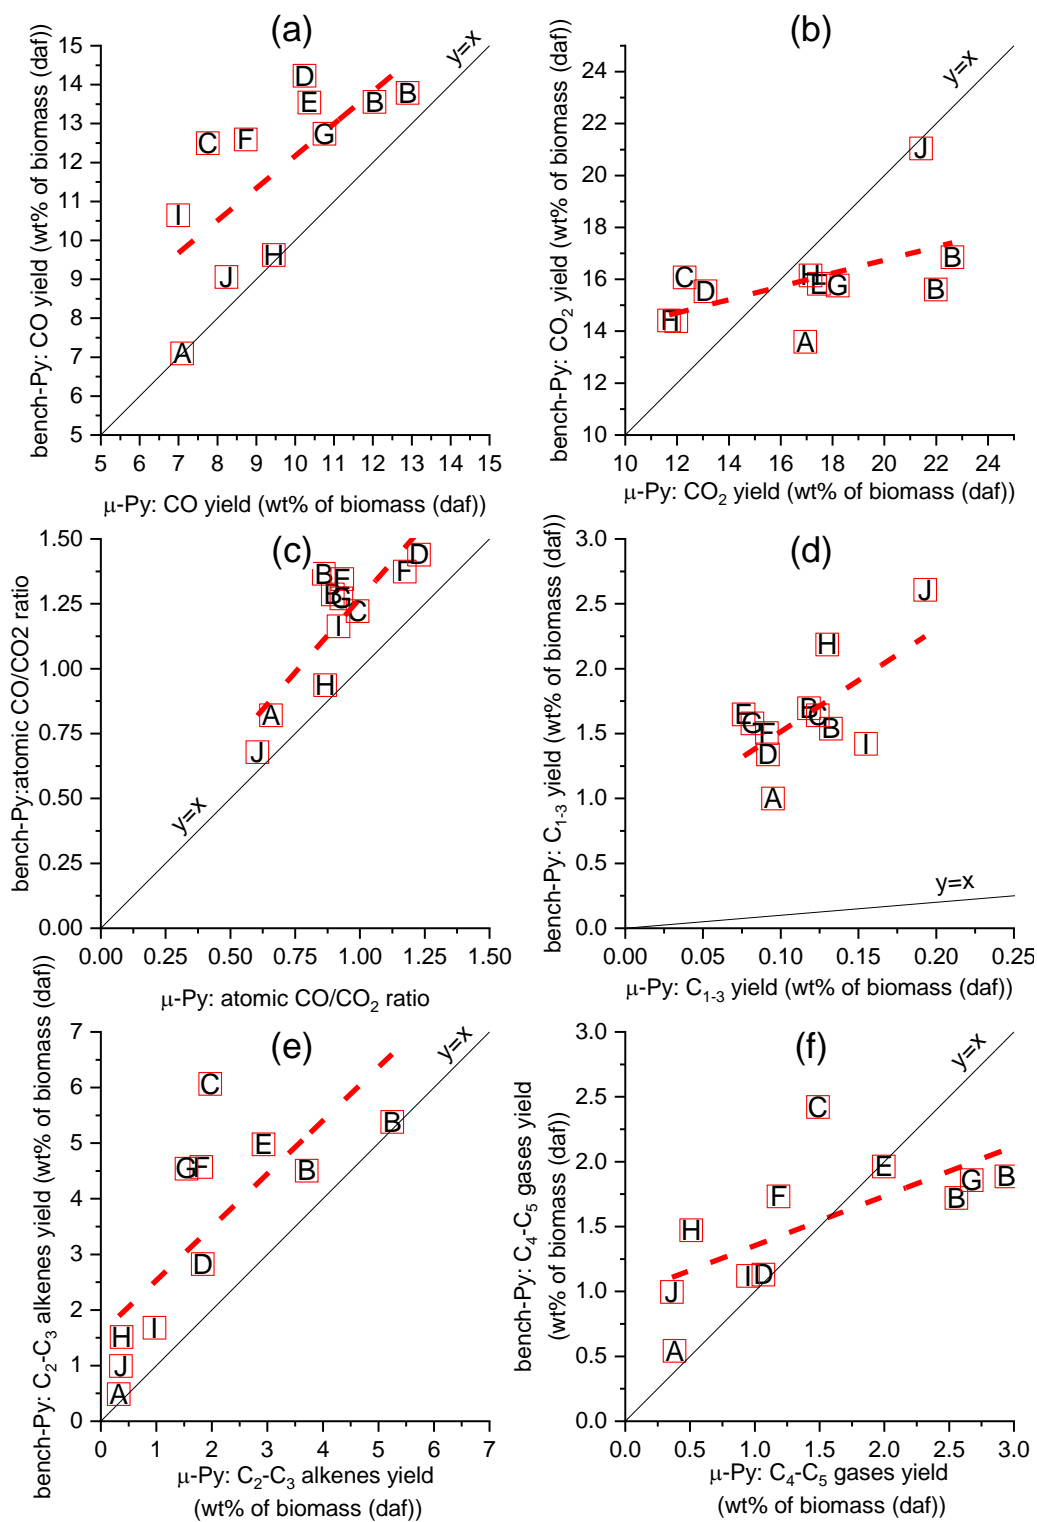

**Fig. S7.** Gas yields obtained by catalytic upgrading of vapors generated in a bench scale fast pyrolysis unit (bench-Py) and a tandem micro pyrolyzer ( $\mu$ -Py). (a-b) Yield of CO and CO<sub>2</sub>. (c) Molar CO/CO<sub>2</sub> ratio. (d-f) Yields of C<sub>1</sub>-C<sub>3</sub> alkanes, C<sub>2</sub>-C<sub>3</sub> alkenes, and C<sub>4</sub>-C<sub>5</sub> gases. Labels A-M refer to catalyst identifiers shown in Table 2 of main article.

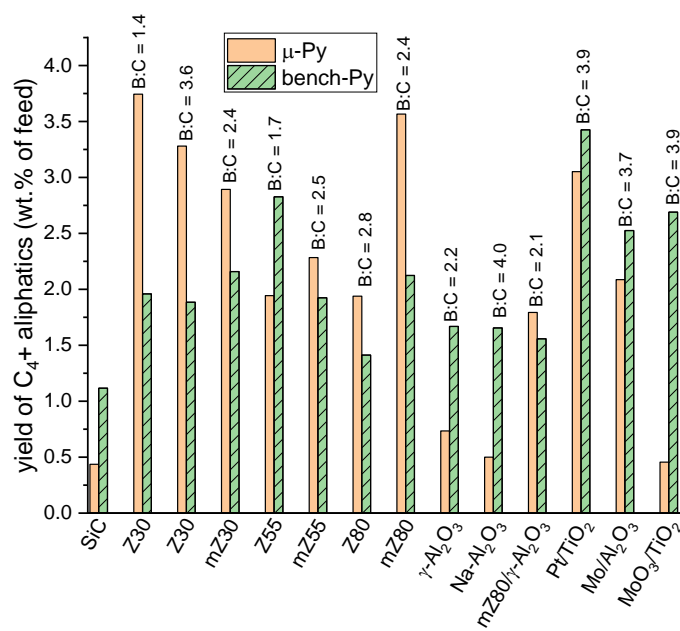

**Fig. S8.** Product yield of C<sub>4</sub>+ aliphatics (wt.% of feed) for vapor upgrading in μ-Py (2 mg catalyst) and bench-Py (100–150 g). Z30, Z55, and Z80 refer to HZSM-5 with Si/Al =16, 28, and 39. mZ30, mZ55, and mZ80 refer to desilicated HZSM-5 with added mesoporosity. For bench-Py, both the C<sub>4</sub>+ aliphatics detected in gas phase and condensed liquid are included.

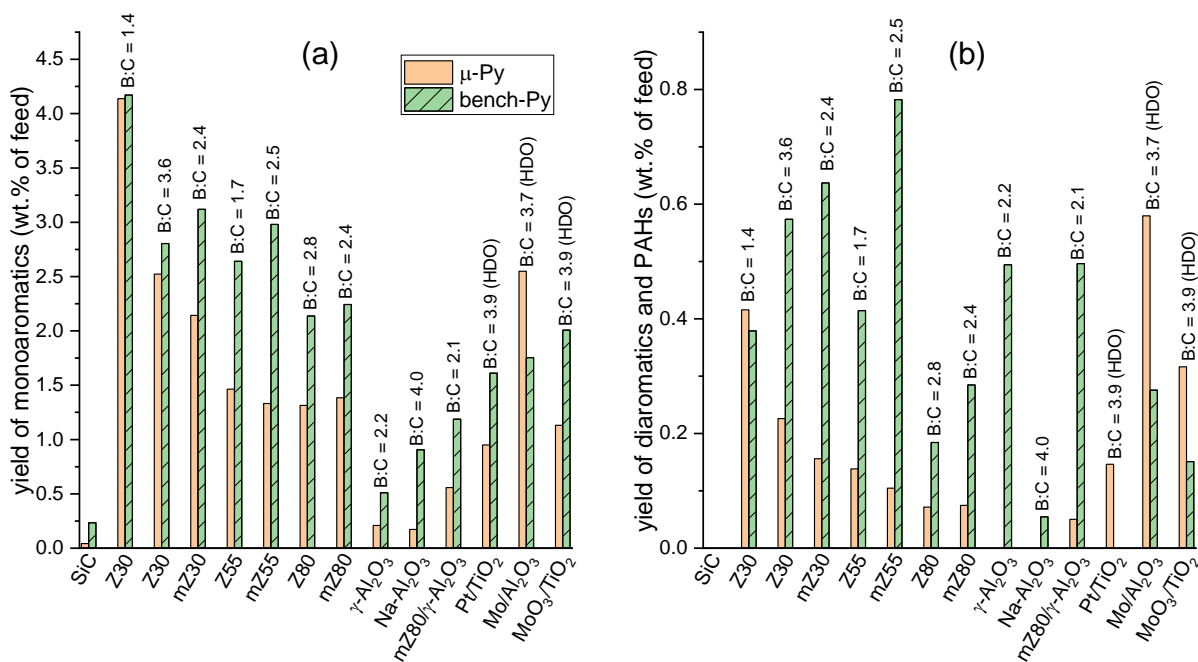

**Fig. S9.** (a) Product yield of monoaromatics (wt.% of feed) and (b) product yield of diaromatics and PAHs (wt.% of feed) for vapor upgrading in μ-Py (2 mg catalyst) and bench-Py (100–150 g). Z30, Z55, and Z80 refer to HZSM-5 with Si/Al =16, 28, and 39. mZ30, mZ55, and mZ80 refer to desilicated HZSM-5 with added mesoporosity.

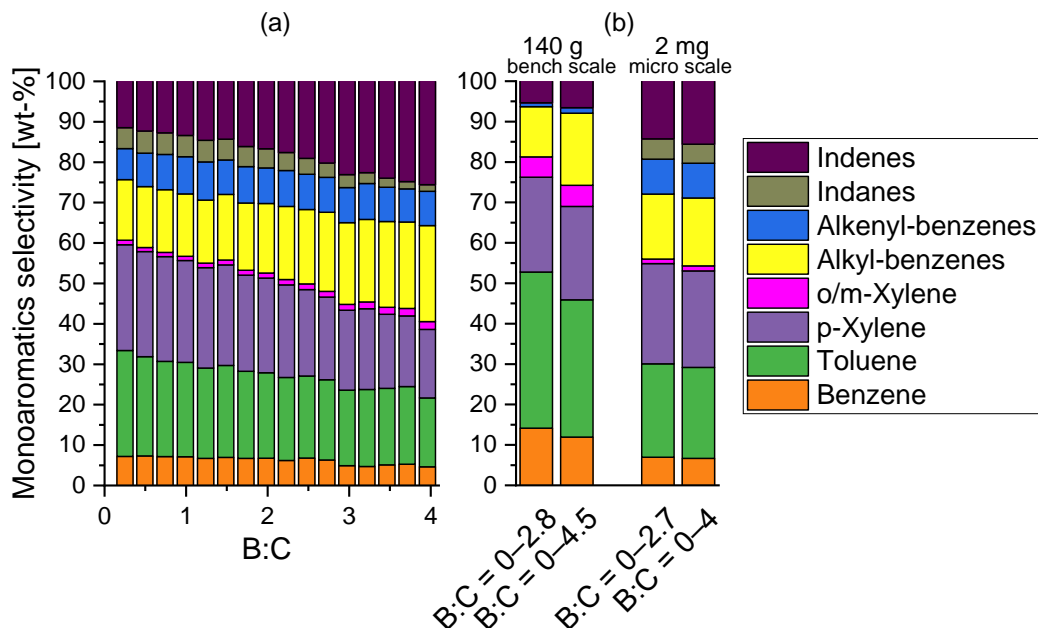

**Fig. S10.** (a) Selectivity of monoaromatics for each injection in  $\mu$ -Py using Z55 (HZSM-5 with Si/Al  $\sim$ 28) as catalyst. (b) Comparison of cumulative selectivity to monoaromatics at similar B:C for bench scale and micro-scale.

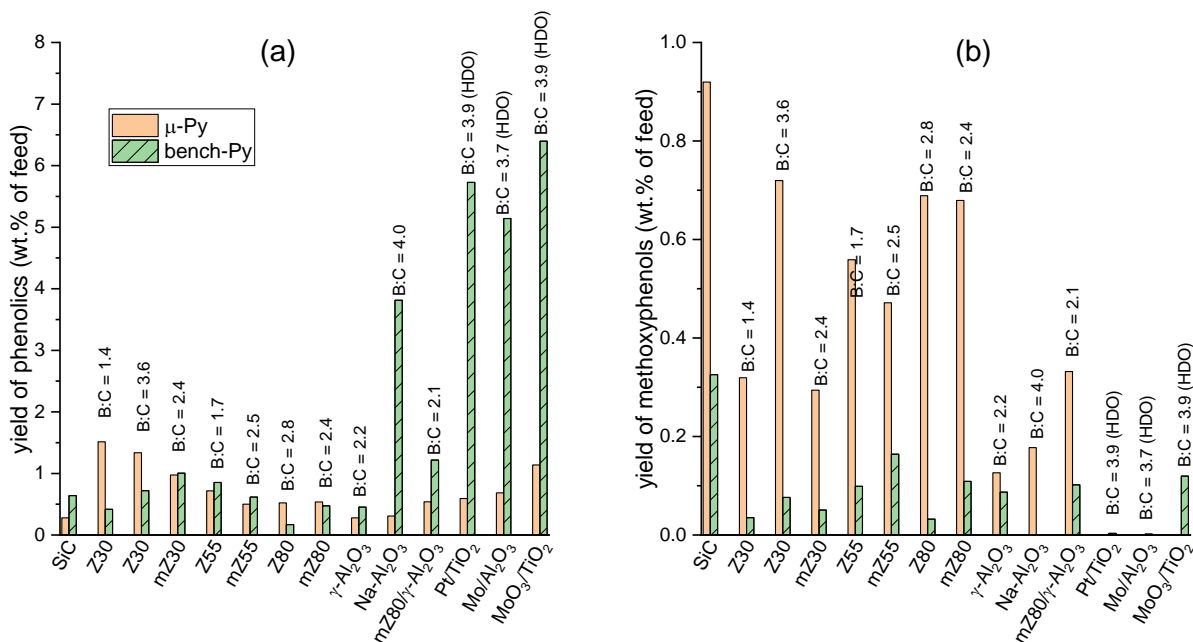

**Fig. S11.** (a) Product yield of phenolics (wt.% of feed) and (b) product yield of methoxy-phenols (wt.% of feed) for vapor upgrading in  $\mu$ -Py (2 mg catalyst) and bench-Py (100–150 g). Z30, Z55, and Z80 refer to HZSM-5 with Si/Al = 16, 28, and 39. mZ30, mZ55, and mZ80 refer to desilicated HZSM-5 with added mesoporosity.



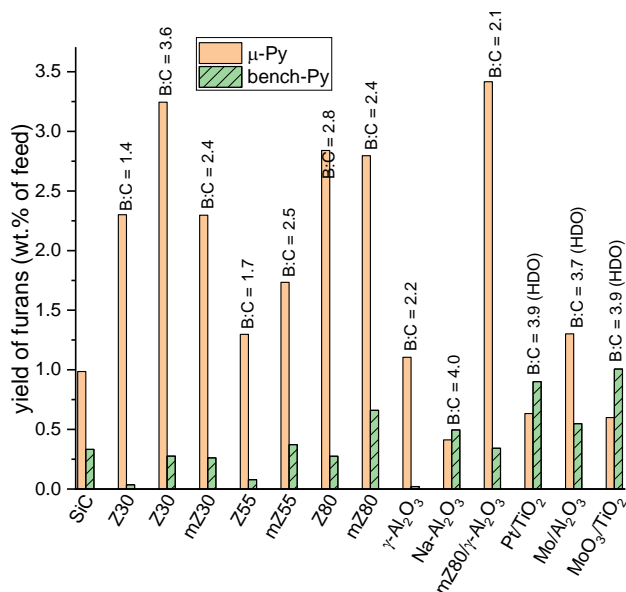

**Fig. S12.** Product yield of furans (wt.% of feed) for vapor upgrading in  $\mu$ -Py (2 mg catalyst) and bench-Py (100–150 g). Z30, Z55, and Z80 refer to HZSM-5 with Si/Al =16, 28, and 39. mZ30, mZ55, and mZ80 refer to desilicated HZSM-5 with added mesoporosity.

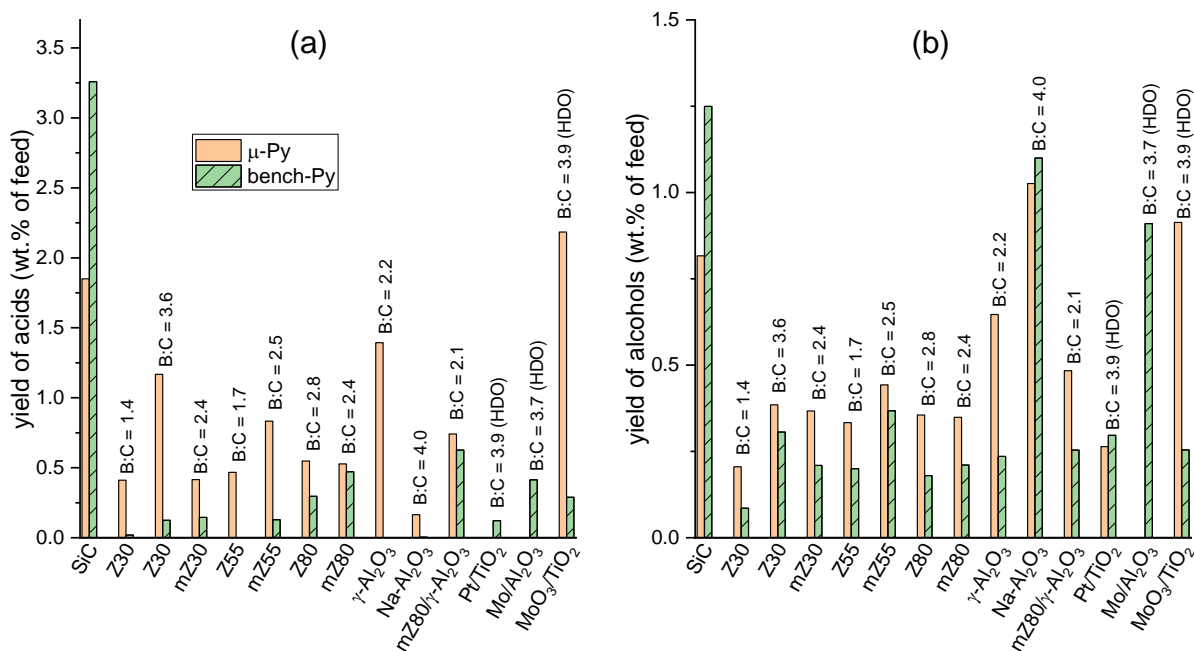

**Fig. S13.** Product yield of (a) acids (wt.% of feed) and (b) product yield of alcohols (wt.% of feed) for vapor upgrading in  $\mu$ -Py (2 mg catalyst) and bench-Py (100–150 g). Z30, Z55, and Z80 refer to HZSM-5 with Si/Al =16, 28, and 39. mZ30, mZ55, and mZ80 refer to desilicated HZSM-5 with added mesoporosity.

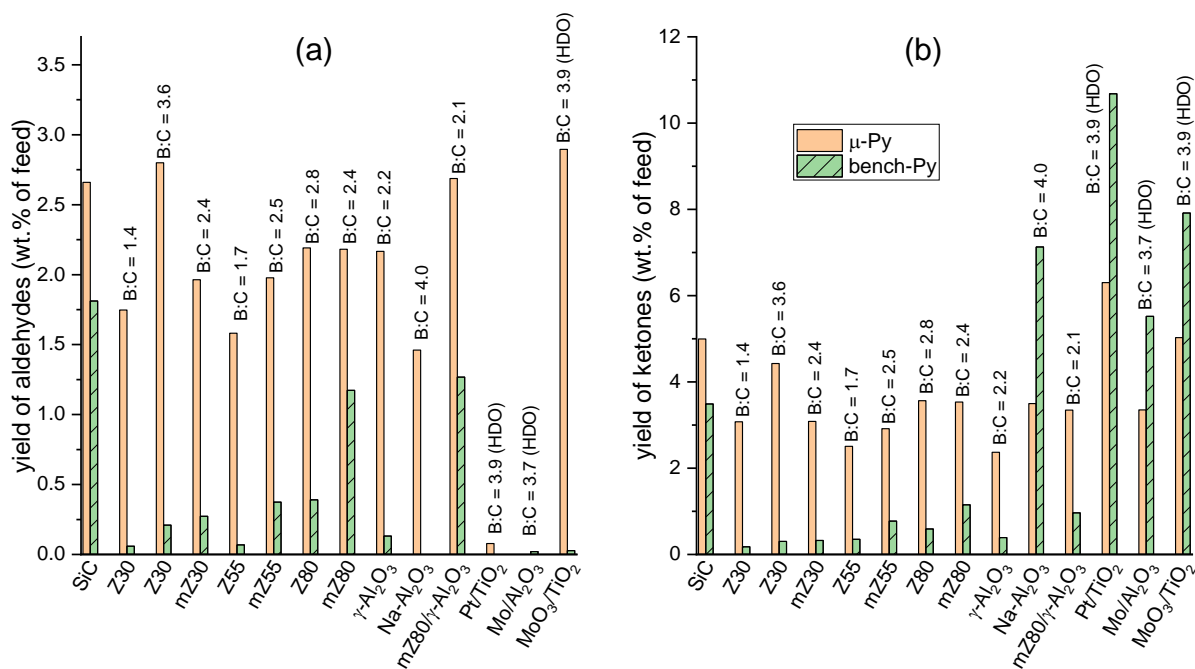

**Fig. S14.** (a) Product yield of aldehydes (wt.% of feed) and (b) product yield of ketones (wt.% of feed) for vapor upgrading in  $\mu$ -Py (2 mg catalyst) and bench-Py (100–150 g). Z30, Z55, and Z80 refer to HZSM-5 with Si/Al =16, 28, and 39. mZ30, mZ55, and mZ80 refer to desilicated HZSM-5 with added mesoporosity.

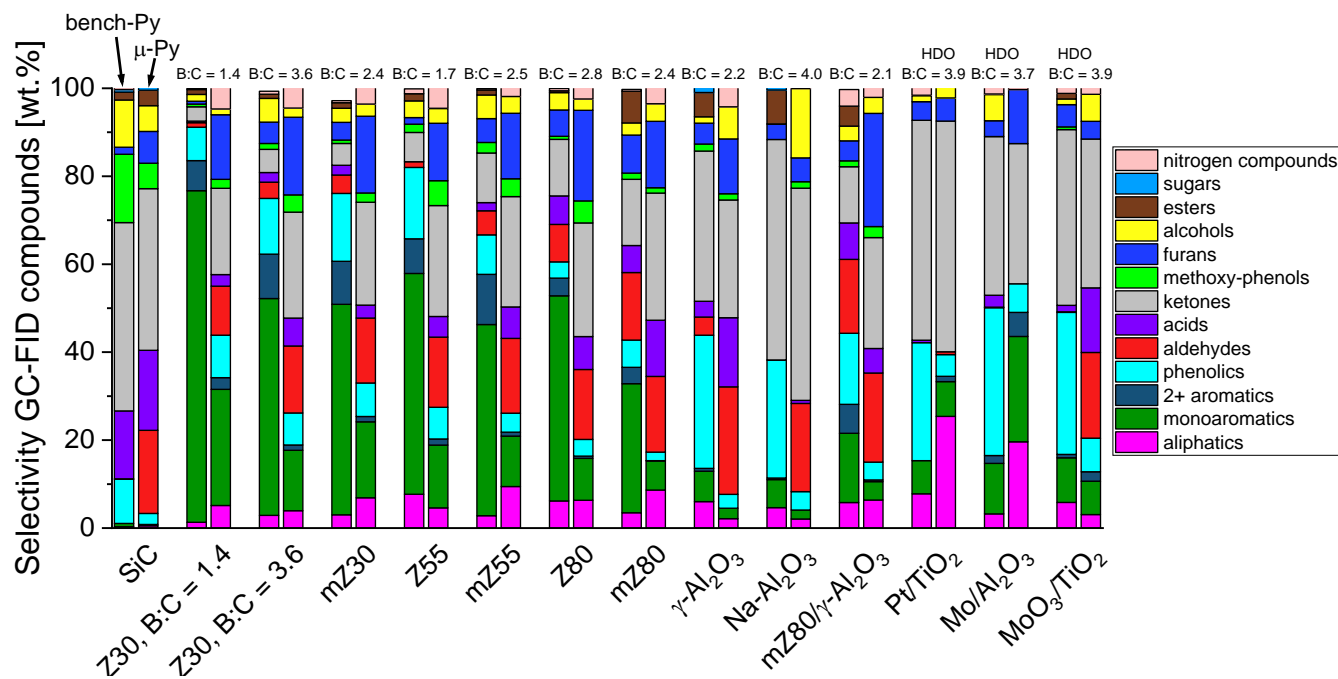

**Fig. S15.** Selectivity amongst compounds identified by GC-FID (wt.%) for bio-oil from bench-Py and non-condensed vapor from  $\mu$ -Py.

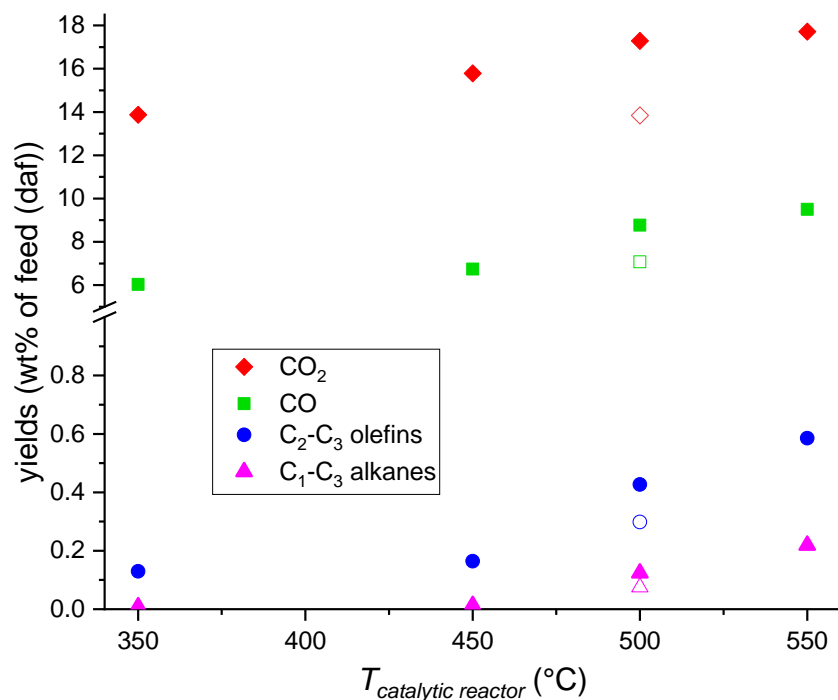

**Fig. S16.** Gas yields (wt.% of feed (daf)) for passing fast pyrolysis vapors over 8 mg char at different reactor temperatures (full symbols). Empty symbols at 500 °C were obtained with SiC as a highly inert reference.

**Table S3.** Product yields (wt.% of feed (daf)) in non-condensed vapors from the  $\mu$ -Py reactor.

| yield (wt.% of feed (daf)) | 2 mg SiC (500 °C) | 8 mg char (350 °C) | 8 mg char (450 °C) | 8 mg char (500 °C) | 8 mg char (550 °C) |
|----------------------------|-------------------|--------------------|--------------------|--------------------|--------------------|
| ALI                        | 0.06              | 0.03               | 0.04               | 0.05               | 0.05               |
| MAR                        | 0.04              | 0.04               | 0.05               | 0.09               | 0.08               |
| PH                         | 0.28              | 0.36               | 0.41               | 0.58               | 0.54               |
| ALD                        | 2.66              | 1.30               | 1.69               | 2.15               | 2.10               |
| AC                         | 1.85              | 0.82               | 1.13               | 0.84               | 0.64               |
| KET                        | 4.99              | 4.13               | 4.71               | 3.88               | 3.51               |
| MPH                        | 0.92              | 1.06               | 1.12               | 0.71               | 0.46               |
| FUR                        | 0.99              | 0.34               | 0.46               | 0.48               | 0.49               |
| ALC                        | 0.82              | 0.84               | 0.82               | 0.79               | 0.77               |
| EST                        | 0.64              | 0.33               | 0.31               | 0.22               | 0.20               |
| SUG                        | 0.06              | 0.21               | 0.15               | 0.10               | 0.09               |

**Table S4.** Oxygen content of non-condensed vapors from the  $\mu$ -Py reactor.

|                  | 2 mg SiC (500 °C) | 8 mg char (350 °C) | 8 mg char (450 °C) | 8 mg char (500 °C) | 8 mg char (550 °C) |
|------------------|-------------------|--------------------|--------------------|--------------------|--------------------|
| wt.% O in vapors | 36.6              | 34.4               | 34.2               | 32.2               | 32.0               |

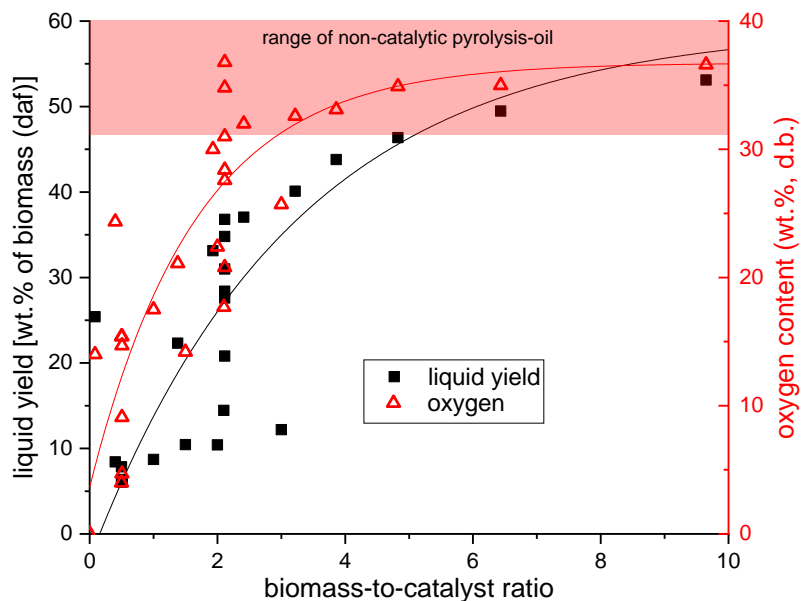

**Fig. S17.** Correlation of bio-oil liquid yield and oxygen content in the bio-oil as a function of cumulative biomass-to-catalyst ratio (w/w) for HZSM-5 based catalysts at ~400-500 °C. Data was obtained from several authors for FP of woody biomass [1–4], rice husks [5], and acid-washed wheat straw [6] at scales that allowed collection of sufficient liquid for further analysis of moisture content and elemental composition.

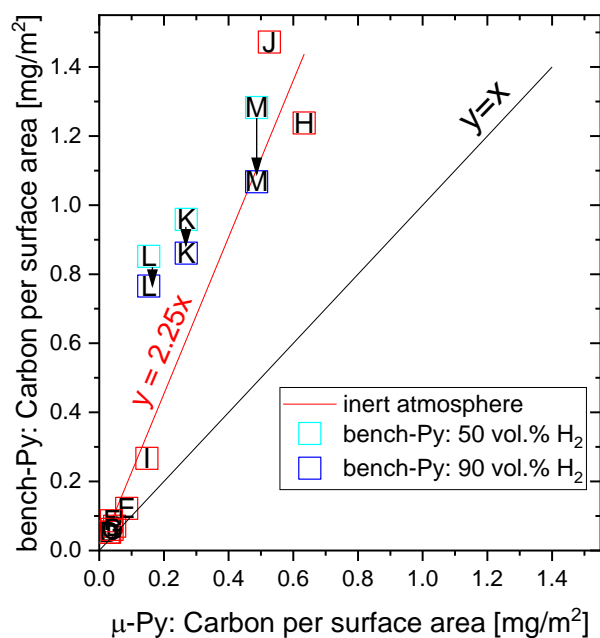

**Fig. S18.** Surface based coking comparison for catalysts tested in bench-Py (~100–150 g catalyst) and tandem  $\mu$ -Py (2 mg catalyst) for the same pyrolysis and catalyst temperatures under inert atmosphere ( $\square$ ), and under hydrogen containing atmosphere in 50 vol.%  $H_2$  ( $\square$ ) and 90 vol.%  $H_2$  ( $\square$ ).

## References

- [1] S.D. Stefanidis, K.G. Kalogiannis, E.F. Iliopoulou, A.A. Lappas, P.A. Pilavachi, In-situ upgrading of biomass pyrolysis vapors: Catalyst screening on a fixed bed reactor, *Bioresour. Technol.* 102 (2011) 8261–8267. doi:10.1016/j.biortech.2011.06.032.
- [2] E.F. Iliopoulou, S.D. Stefanidis, K. Kalogiannis, A.C. Psarras, A. Delimitis, K.S. Triantafyllidis, A.A. Lappas, Pilot-scale validation of Co-ZSM-5 catalyst performance in the catalytic upgrading of biomass pyrolysis vapours, *Green Chem.* 16 (2014) 662–674. doi:10.1039/C3GC41575A.
- [3] P.T. Williams, P.A. Horne, The influence of catalyst regeneration on the composition of zeolite-upgraded biomass pyrolysis oils, *Fuel*. 74 (1995) 1839–1851. doi:10.1016/0016-2361(95)80017-C.
- [4] K. Iisa, R.J. French, K.A. Orton, A. Dutta, J.A. Schaidle, Production of low-oxygen bio-oil via ex situ catalytic fast pyrolysis and hydrotreating, *Fuel*. 207 (2017) 413–422. doi:10.1016/j.fuel.2017.06.098.
- [5] P.T. Williams, N. Nugranad, Comparison of products from the pyrolysis and catalytic pyrolysis of rice husks, *Energy*. 25 (2000) 493–513. doi:10.1016/S0360-5442(00)00009-8.
- [6] H. Hernando, S. Jiménez-Sánchez, J. Feroso, P. Pizarro, J.M. Coronado, D.P. Serrano, Assessing biomass catalytic pyrolysis in terms of deoxygenation pathways and energy yields for the efficient production of advanced biofuels, *Catal. Sci. Technol.* 6 (2016) 2829–2843. doi:10.1039/c6cy00522e.
